# Supplementary material for: Wildfire smoke-plume rise: a simple energy balance parameterization
Source: Copernicus journal article supplement (doi:10.5194/acp-21-1407-2021), 2021-02-02
Supplement: Supplementary file 1 [file acp-21-1407-2021-supplement.zip]

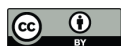

## *Supplement of*

# **Wildfire smoke-plume rise: a simple energy balance parameterization**

**Nadya Moisseeva and Roland Stull**

*Correspondence to:* Nadya Moisseeva (nmoisseeva@eoas.ubc.ca)

- acp-21-1407-2021-supplement-title-page.pdf
- sample\_run
  - README
  - main
    - \* fuels.m
    - \* namelist.fire
    - \* namelist.fire\_emissions
    - \* namelist.input
  - spinup
    - \* LANDUSE.TBL
    - \* fuels.m
    - \* input\_sounding
    - \* input\_tsk
    - \* namelist.fire
    - \* namelist.fire\_emissions
    - \* namelist.input

The copyright of individual parts of the supplement might differ from the CC BY 4.0 License.
